# Supplementary material for: Understanding the high performance of PdSn–TaN(tantalum nitride)/C electrocatalysts for the methanol oxidation reaction: coupling nitrides and oxophilic elements
Source: Royal Society of Chemistry journal article supplement (doi:10.1039/d1ta07382f), 2021-11-24
Supplement: d1ta07382f1.pdf [file d1ta07382f1.pdf]

## **SUPPORTING INFORMATION**

### **Transition metal nitrides doped catalysts (PdSn-TaN/C) as promising catalysts for high-performance methanol electrooxidation in alkaline medium**

#### **Table of Content**

- 
- I. Additional information for DFT models**
  - II. Additional information for ICP-MS results**
  - III. Additional information for TEM fitting**
  - IV. Additional information for XPS fitting**
  - V. Additional information for Electrochemical studies (MOR)**
  - VI. Additional information for EIS fitting**
  - VII. Additional information for in-situ FTIR images**
  - VIII. Additional information for DFT calculations**
  - IX. Additional information for Electrochemical studies for  
TaN/C and FAOR**
-

## I. Additional information for DFT models

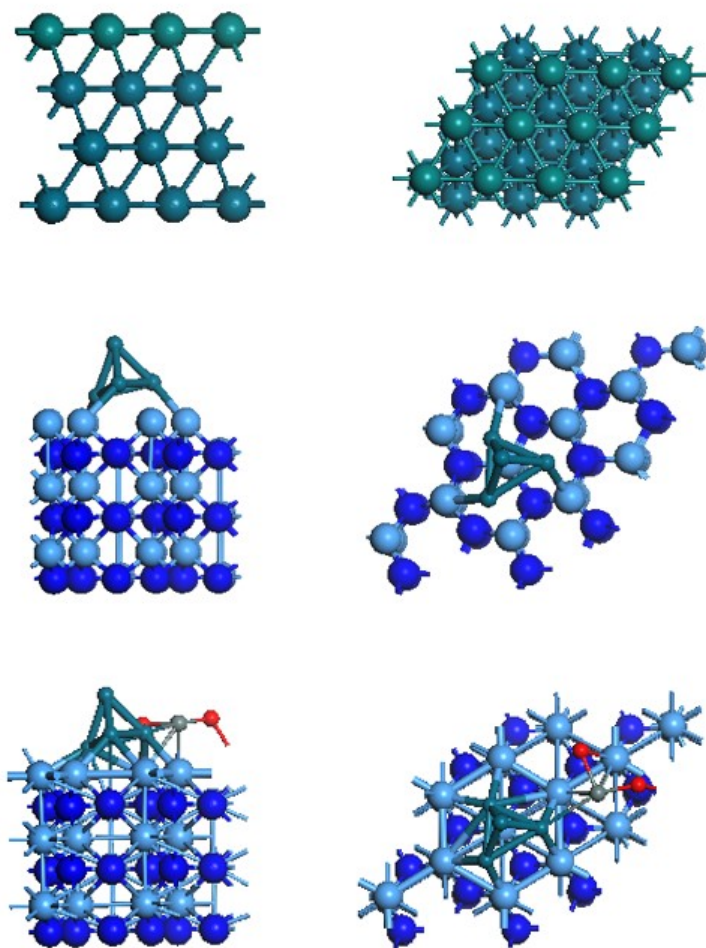

**Figure S1.** The stable configurations of Pd(111), Pd<sub>4</sub>/TaN(001) and Pd<sub>4</sub>-SnO<sub>2</sub>/TaN(001) models.

## II. Additional information for ICP-MS results

**Table S1.** The actual loading amounts and feed amounts of Pd<sub>x</sub>Sn<sub>y</sub>-TaN/C and Pd<sub>1</sub>Sn<sub>3</sub>/C-m-alkaline catalysts.

| Materials                                         | Actual loading amount |         | Feed amount |         |
|---------------------------------------------------|-----------------------|---------|-------------|---------|
|                                                   | Pd(wt%)               | Sn(wt%) | Pd(wt%)     | Sn(wt%) |
| Pd <sub>1</sub> Sn <sub>1</sub> -TaN/C-m-alkaline | 2.95                  | 2.92    | 3.33        | 3.71    |
| Pd <sub>1</sub> Sn <sub>3</sub> -TaN/C-w-alkaline | 3.15                  | 9.89    | 3.33        | 11.13   |
| Pd <sub>1</sub> Sn <sub>3</sub> -TaN/C-m-alkaline | 3.44                  | 10.13   | 3.33        | 11.13   |
| Pd <sub>1</sub> Sn <sub>3</sub> -TaN/C-s-alkaline | 3.24                  | 9.18    | 3.33        | 11.13   |
| Pd-TaN/C-m-alkaline                               | 3.43                  | 0       | 3.33        | 0       |
| Pd <sub>1</sub> Sn <sub>3</sub> /C-m-alkaline     | 3.13                  | 8.99    | 3.33        | 11.13   |

### III. Additional information for TEM fitting

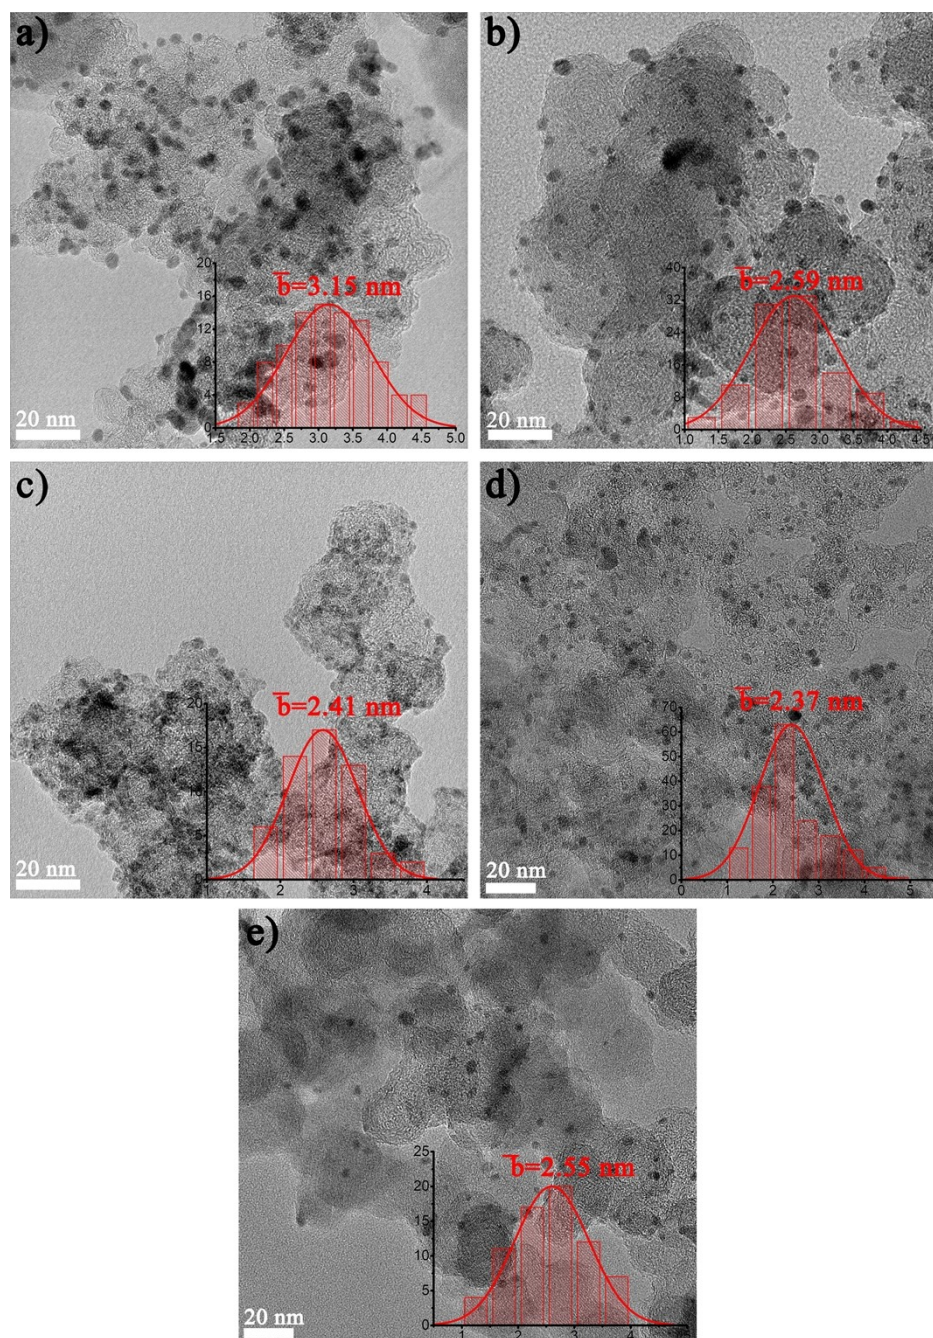

**Figure S2.** TEM images of the Pd<sub>1</sub>Sn<sub>1</sub>-TaN/C-m-alkaline (a), Pd<sub>1</sub>Sn<sub>3</sub>-TaN/C-w-alkaline (b), Pd<sub>1</sub>Sn<sub>3</sub>-TaN/C-s-alkaline (c), Pd-TaN/C-m-alkaline (d) and Pd<sub>1</sub>Sn<sub>3</sub>--m-alkaline (e).

#### IV. Additional information for XPS fitting

**Table S2.** XPS elemental analysis of Pd in the Pd<sub>x</sub>Sn<sub>y</sub>-TaN/C catalysts.

| Materials                                         | Atomic percentage |           |                  |           |
|---------------------------------------------------|-------------------|-----------|------------------|-----------|
|                                                   | Pd                |           | Pd <sup>δ+</sup> |           |
| Pd <sub>1</sub> Sn <sub>1</sub> -TaN/C-m-alkaline | 83.98 %           | 335.36 eV | 16.01 %          | 337.24 eV |
| Pd <sub>1</sub> Sn <sub>3</sub> -TaN/C-w-alkaline | 78.51 %           | 335.42 eV | 21.49 %          | 337.38 eV |
| Pd <sub>1</sub> Sn <sub>3</sub> -TaN/C-m-alkaline | 74.81 %           | 335.19 eV | 25.19 %          | 337.11 eV |
| Pd <sub>1</sub> Sn <sub>3</sub> -TaN/C-s-alkaline | 55.14 %           | 335.64 eV | 44.87 %          | 337.64 eV |
| Pd-TaN/C-m-alkaline                               | 86.48 %           | 335.98 eV | 13.51 %          | 337.78 eV |
| Pd <sub>1</sub> Sn <sub>3</sub> /C-m-alkaline     | 70.54 %           | 335.29 eV | 29.46 %          | 337.30 eV |

**Table S3.** XPS elemental analysis of Sn in the Pd<sub>x</sub>Sn<sub>y</sub>-TaN/C catalysts.

| Materials                                         | Atomic percentage |           |                  |           |
|---------------------------------------------------|-------------------|-----------|------------------|-----------|
|                                                   | Sn                |           | Sn <sup>δ+</sup> |           |
| Pd <sub>1</sub> Sn <sub>3</sub> -TaN/C-w-alkaline | 16.75%            | 484.52 eV | 83.25%           | 486.73 eV |
| Pd <sub>1</sub> Sn <sub>1</sub> -TaN/C-m-alkaline | 27.33%            | 485.11 eV | 72.67%           | 486.9 eV  |
| Pd <sub>1</sub> Sn <sub>3</sub> -TaN/C-m-alkaline | 12.37%            | 484.38 eV | 87.63%           | 486.2 eV  |
| Pd <sub>1</sub> Sn <sub>3</sub> -TaN/C-s-alkaline | 6.87%             | 485.11 eV | 93.13%           | 486.75 eV |

**Table S4.** XPS elemental analysis of Ta in the Pd<sub>x</sub>Sn<sub>y</sub>-TaN/C catalysts.

| Materials                                         | Atomic percentage |        |          |        |
|---------------------------------------------------|-------------------|--------|----------|--------|
|                                                   | O-Ta-O            | O-Ta-N | N-Ta-N   |        |
| Pd <sub>1</sub> Sn <sub>3</sub> -TaN/C-w-alkaline | 29.17%            | 50.59% | 26.66 eV | 20.24% |
| Pd <sub>1</sub> Sn <sub>1</sub> -TaN/C-m-alkaline | 17.95%            | 63.58% | 26.14 eV | 18.47% |
| Pd <sub>1</sub> Sn <sub>3</sub> -TaN/C-m-alkaline | 32.37%            | 54.61% | 26.39 eV | 13.03% |
| Pd <sub>1</sub> Sn <sub>3</sub> -TaN/C-s-alkaline | 37.43%            | 51.91% | 25.69 eV | 10.67% |
| Pd-TaN/C-m-alkaline                               | 32.78%            | 49.07% | 25.70 eV | 18.15% |

## V. Additional information for Electrochemical studies (MOR)

**Table S5.** Comparison of PdSn/TaN-C with previous reported Pd-based catalysts towards MOR in alkaline medium.

| Materials                               | Electrolyte                          | Mass activity<br>(A g <sub>metal</sub> <sup>-1</sup> ) | CA test<br>(s) | Residual current<br>(A g <sub>metal</sub> <sup>-1</sup> ) | ref              |
|-----------------------------------------|--------------------------------------|--------------------------------------------------------|----------------|-----------------------------------------------------------|------------------|
| PdCuM (M = Ru, Rh, Ir)                  | 1 M KOH + 1 M CH <sub>3</sub> OH     | 1660.8                                                 | 3000           | < 100                                                     | [1]              |
| Pd-PdO PNT                              | 1 M KOH + 1 M CH <sub>3</sub> OH     | 1111.3                                                 | 3600           | < 20                                                      | [2]              |
| Pd/NL-GCN                               | 0.5 M NaOH + 1 M CH <sub>3</sub> OH  | 816.5                                                  | 3000           | 150                                                       | [3]              |
| Pd <sub>3</sub> Cu <sub>1</sub>         | 1 M KOH + 1 M CH <sub>3</sub> OH     | 600                                                    | 3600           | < 25                                                      | [4]              |
| Pt <sub>84</sub> Pd <sub>16</sub>       | 0.1 M KOH + 1 M CH <sub>3</sub> OH   | 999                                                    | 3000           | < 200                                                     | [5]              |
| PdCo nanowire                           | 1 M KOH + 1 M CH <sub>3</sub> OH     | 1205                                                   | 2000           | < 30                                                      | [6]              |
| Pd <sub>20-x</sub> Ag <sub>x</sub> /CNT | 1 M KOH + 0.5 M CH <sub>3</sub> OH   | 731                                                    | 2000           | < 220                                                     | [7]              |
| PdCu nanocages                          | 0.5 M KOH + 1 M CH <sub>3</sub> OH   | 823                                                    | 6000<br>(3600) | 50<br>(< 100)                                             | [8]              |
| PdSn                                    | 1 M KOH + 1 M CH <sub>3</sub> OH     | 1109.1                                                 | 4000           | 67.8                                                      | [9]              |
| PdPt                                    | 1 M KOH + 0.5 M CH <sub>3</sub> OH   | 1130                                                   | 4000           | 151.7                                                     | [10]             |
| PtRu nanowires                          | 0.1 M KOH + 0.5 M CH <sub>3</sub> OH | 820                                                    | 4000           | ~200                                                      | [11]             |
| Pd/SiO <sub>2</sub> @RGO                | 1 M KOH + 1 M CH <sub>3</sub> OH     | 1533                                                   | 1500           | 308.5                                                     | [12]             |
| PtCuPd@PdCu@Ru                          | 1 M KOH + 2 M CH <sub>3</sub> OH     | 2480                                                   | 6000           | < 350                                                     | [13]             |
| Pd-CeO <sub>2</sub>                     | 1 M KOH + 1 M CH <sub>3</sub> OH     | 1500                                                   | 3000           | 109.4                                                     | [14]             |
| Commercial PtRu/C                       | 1 M KOH + 1 M CH <sub>3</sub> OH     | 260                                                    | 3000           | 61.1                                                      | [14]             |
| PdSn/TaN-C                              | 1 M KOH + 1 M CH <sub>3</sub> OH     | 3293.46                                                | 3600           | 501.0                                                     | <b>This work</b> |

## VI. Additional information for EIS fitting

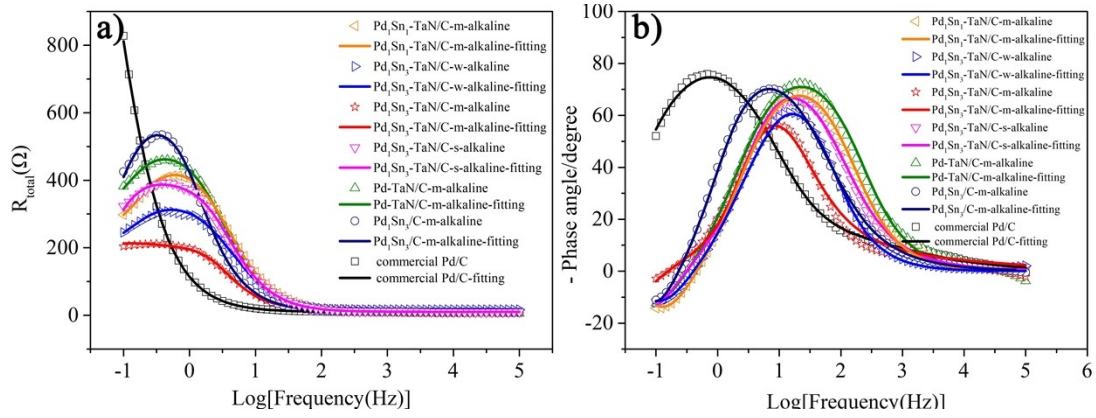

**Figure S3.** The corresponding bode plots for MOR in alkaline medium.

**Table S6.** Kinetic parameters of  $\text{Pd}_x\text{Sn}_y\text{-TaN/C}$ ,  $\text{Pd}_1\text{Sn}_3\text{/C-m-alkaline}$  and commercial Pd/C towards alkaline MOR.

| Materials                                        | $R_s$<br>( $\Omega$ ) | $R_{ct}$<br>( $\Omega$ ) |
|--------------------------------------------------|-----------------------|--------------------------|
| $\text{Pd}_1\text{Sn}_1\text{-TaN/C-m-alkaline}$ | 9.9                   | 427.6                    |
| $\text{Pd}_1\text{Sn}_3\text{-TaN/C-w-alkaline}$ | 16.7                  | 302.2                    |
| $\text{Pd}_1\text{Sn}_3\text{-TaN/C-m-alkaline}$ | 10.6                  | 200.2                    |
| $\text{Pd}_1\text{Sn}_3\text{-TaN/C-s-alkaline}$ | 9.97                  | 334.9                    |
| $\text{Pd-TaN/C-m-alkaline}$                     | 6.4                   | 477.2                    |
| $\text{Pd}_1\text{Sn}_3\text{/C-m-alkaline}$     | 9.6                   | 645.2                    |
| Commercial Pd/C                                  | 6.5                   | 1690.0                   |



## VII. Additional information for in-situ FTIR studies

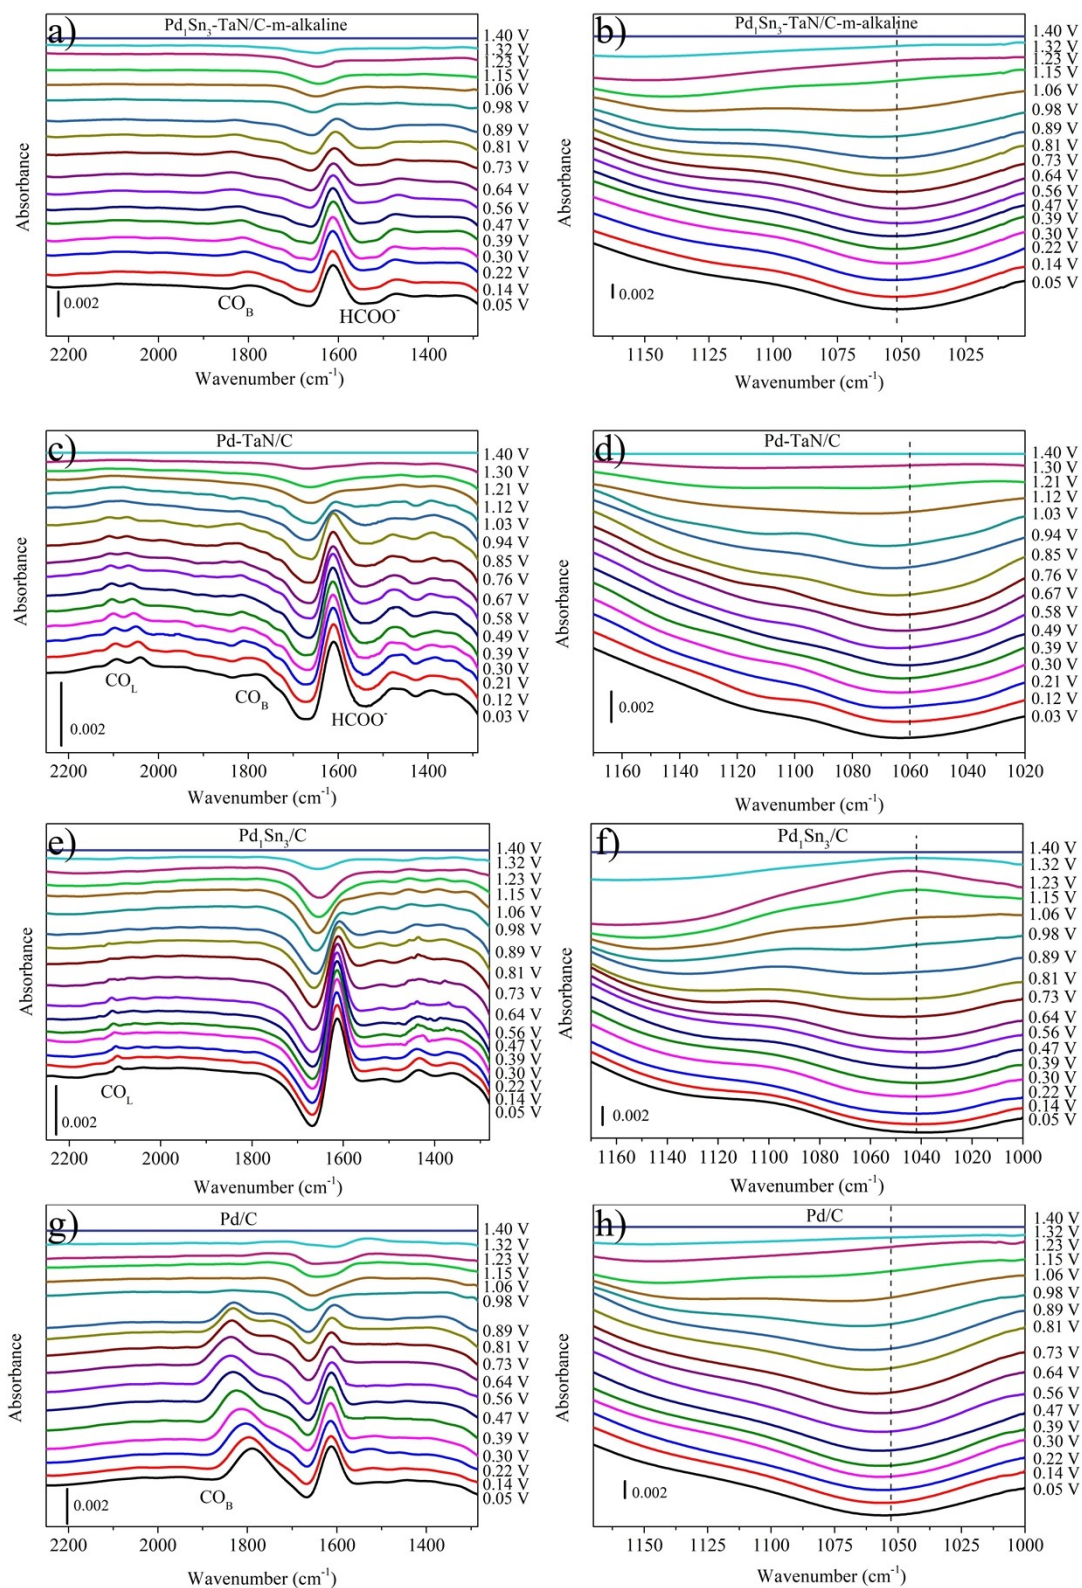

**Figure S4.** The in-situ FTIR characterization of PdSn/TaN-C (a,b), Pd/TaN-C (c,d), PdSn/C (e, f) and commercial Pd/C (g, h). (the reference spectra are recorded at 1.4 V, where the  $\text{CO}_{\text{ad}}$  is suppressed; the dash lines in Figure S4(b, d, f, h) represent the band at around 1050  $\text{cm}^{-1}$ .)



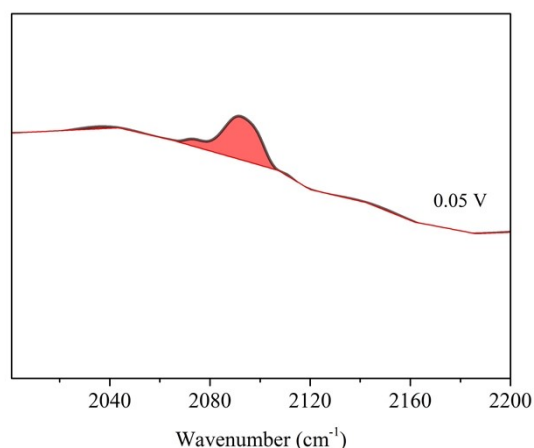

**Figure S5.** The CO area fit (intensity) of a peak at 0.05V (with the spectrum at 1.4 V as the reference) in **Figure S4(e)** for PdSn/C.

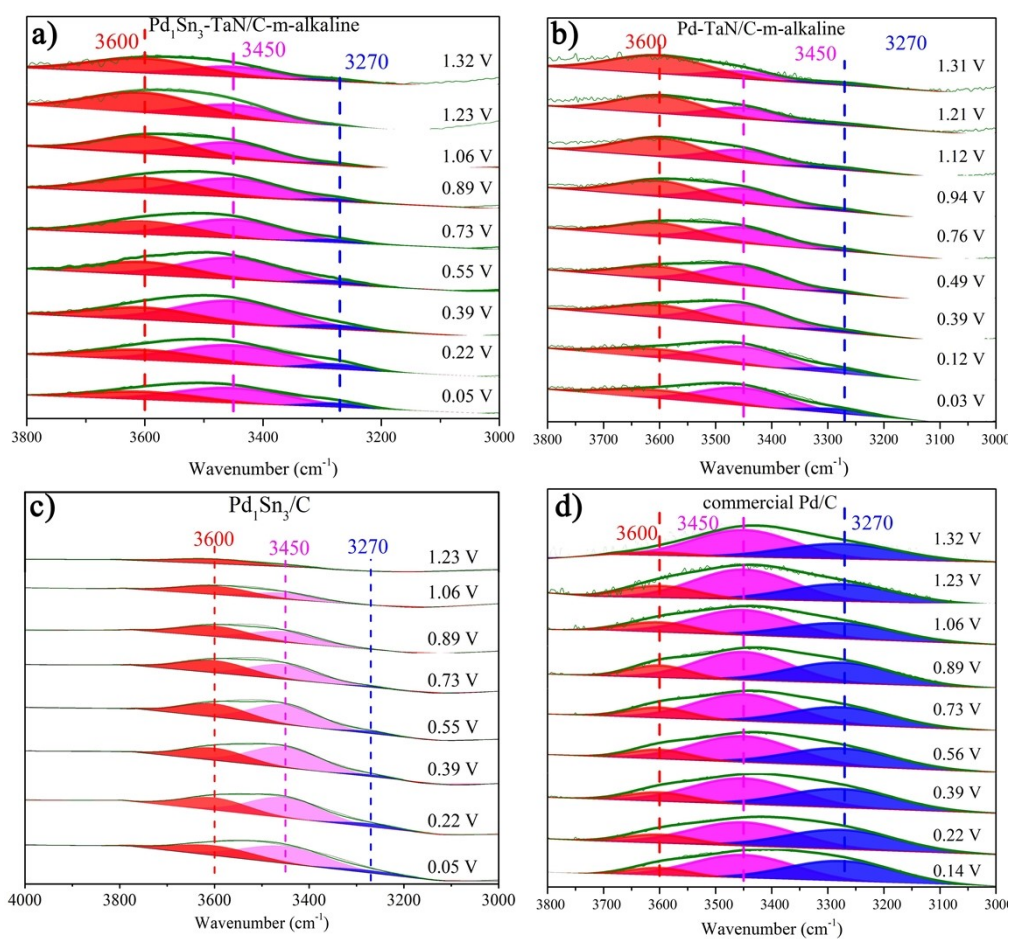

**Figure S6.** The fitting results of H<sub>2</sub>O features band on Pd<sub>1</sub>Sn<sub>3</sub>-TaN/C-m-alkaline(a), Pd-TaN/C(b), Pd<sub>1</sub>Sn<sub>3</sub>/C(c) and commercial Pd/C(d) in the range of 3000 to 3800 cm<sup>-1</sup>.

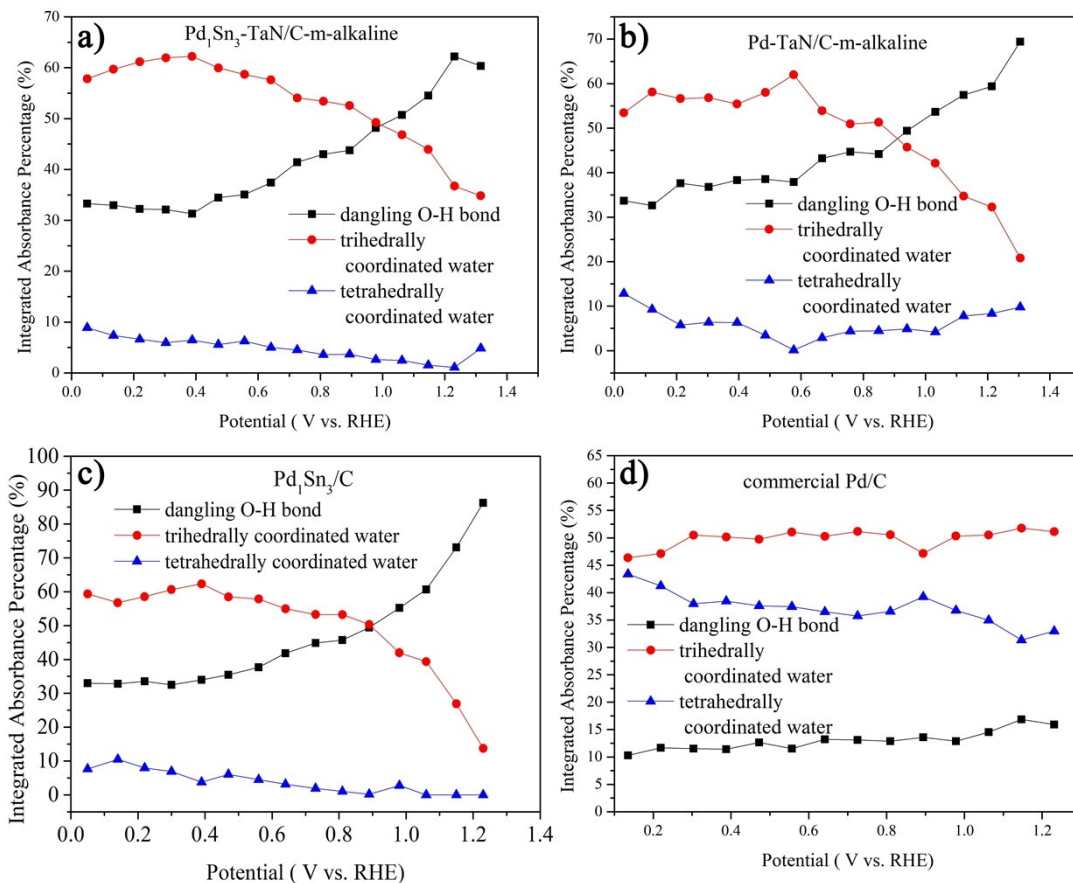

**Figure S7.** In-situ FTIR study on the integrated intensities percentage of H<sub>2</sub>O band fitting results on Pd<sub>1</sub>Sn<sub>3</sub>-TaN/C-m-alkaline(a), Pd-TaN/C(b), Pd<sub>1</sub>Sn<sub>3</sub>/C(c) and commercial Pd/C(d) catalysts.

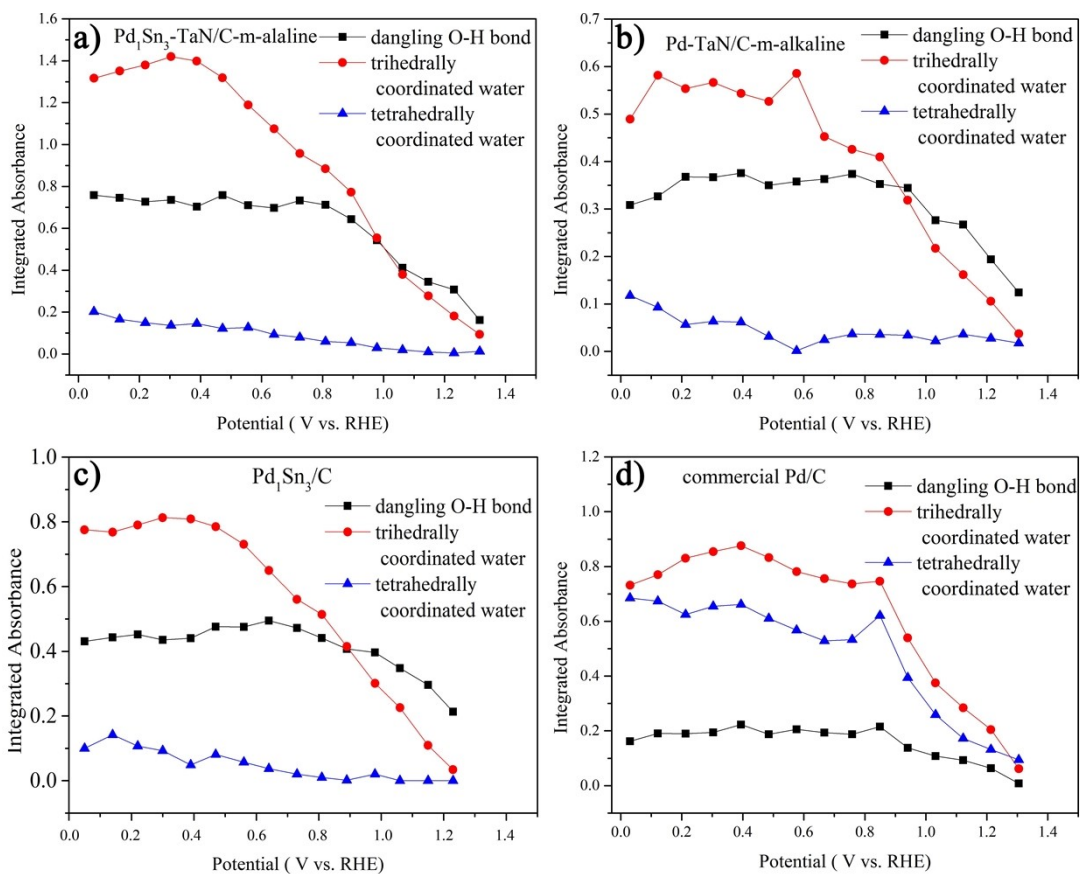

**Figure S8.** In-situ FTIR study on the potential dependence of the integrated intensities of H<sub>2</sub>O band fitting results on Pd<sub>1</sub>Sn<sub>3</sub>-TaN/C-m-alkaline(a), Pd-TaN/C(b), Pd<sub>1</sub>Sn<sub>3</sub>/C(c) and commercial Pd/C(d) catalysts.

**Table S7.** In-situ FTIR fitting analysis of H<sub>2</sub>O in the PdSn-TaN/C catalysts.

| Potentials<br>(V) | dangling O-H bond |        | trihedrally coordinated<br>water |          | tetrahedrally coordinated water |          |
|-------------------|-------------------|--------|----------------------------------|----------|---------------------------------|----------|
|                   | Area Fit          | Area   | Area Fit                         | Area Fit | Area Fit                        | Area Fit |
|                   | (intensity)       | Fit(%) | (intensity)                      | (%)      | (intensity)                     | (%)      |
| 0.05              | 0.758             | 33.294 | 1.317                            | 57.817   | 0.202                           | 8.889    |
| 0.14              | 0.745             | 32.945 | 1.351                            | 59.712   | 0.166                           | 7.344    |
| 0.22              | 0.727             | 32.214 | 1.380                            | 61.167   | 0.149                           | 6.619    |
| 0.30              | 0.736             | 32.115 | 1.420                            | 61.941   | 0.136                           | 5.944    |
| 0.39              | 0.703             | 31.294 | 1.399                            | 62.229   | 0.146                           | 6.477    |
| 0.47              | 0.758             | 34.471 | 1.319                            | 59.974   | 0.122                           | 5.555    |
| 0.56              | 0.710             | 35.061 | 1.189                            | 58.699   | 0.126                           | 6.240    |
| 0.64              | 0.698             | 37.395 | 1.075                            | 57.593   | 0.094                           | 5.012    |
| 0.73              | 0.733             | 41.420 | 0.957                            | 54.063   | 0.080                           | 4.517    |
| 0.81              | 0.712             | 42.993 | 0.885                            | 53.410   | 0.060                           | 3.597    |
| 0.89              | 0.643             | 43.770 | 0.772                            | 52.550   | 0.054                           | 3.680    |
| 0.98              | 0.543             | 48.164 | 0.555                            | 49.226   | 0.029                           | 2.611    |
| 1.06              | 0.411             | 50.735 | 0.379                            | 46.798   | 0.020                           | 2.467    |
| 1.15              | 0.345             | 54.510 | 0.278                            | 43.944   | 0.010                           | 1.545    |
| 1.23              | 0.308             | 62.211 | 0.182                            | 36.720   | 0.005                           | 1.069    |
| 1.32              | 0.162             | 60.333 | 0.093                            | 34.833   | 0.013                           | 4.835    |

**Table 8.** In-situ FTIR fitting analysis of H<sub>2</sub>O in the Pd-TaN/C catalysts.

| Potentials<br>(V) | dangling O-H bond |        | trihedrally coordinated<br>water |          | tetrahedrally coordinated water |          |
|-------------------|-------------------|--------|----------------------------------|----------|---------------------------------|----------|
|                   | Area Fit          | Area   | Area Fit                         | Area Fit | Area Fit                        | Area Fit |
|                   | (intensity)       | Fit(%) | (intensity)                      | (%)      | (intensity)                     | (%)      |
| 0.03              | 0.308             | 33.704 | 0.489                            | 53.448   | 0.118                           | 12.847   |
| 0.12              | 0.326             | 32.610 | 0.582                            | 58.110   | 0.093                           | 9.280    |
| 0.21              | 0.368             | 37.599 | 0.553                            | 56.620   | 0.057                           | 5.781    |
| 0.30              | 0.367             | 36.792 | 0.566                            | 56.832   | 0.064                           | 6.376    |
| 0.39              | 0.376             | 38.292 | 0.543                            | 55.411   | 0.062                           | 6.297    |
| 0.49              | 0.350             | 38.541 | 0.527                            | 58.015   | 0.031                           | 3.444    |
| 0.58              | 0.358             | 37.868 | 0.585                            | 61.999   | 0.001                           | 0.132    |
| 0.67              | 0.363             | 43.204 | 0.452                            | 53.886   | 0.024                           | 2.910    |
| 0.76              | 0.374             | 44.697 | 0.426                            | 50.940   | 0.036                           | 4.363    |
| 0.85              | 0.353             | 44.198 | 0.409                            | 51.320   | 0.036                           | 4.482    |
| 0.94              | 0.345             | 49.413 | 0.319                            | 45.705   | 0.034                           | 4.882    |
| 1.03              | 0.276             | 53.662 | 0.217                            | 42.135   | 0.022                           | 4.202    |
| 1.12              | 0.267             | 57.447 | 0.162                            | 34.743   | 0.036                           | 7.810    |
| 1.21              | 0.194             | 59.364 | 0.106                            | 32.268   | 0.027                           | 8.368    |
| 1.30              | 0.124             | 69.410 | 0.037                            | 20.807   | 0.017                           | 9.784    |



**Table S9.** In-situ FTIR fitting analysis of H<sub>2</sub>O in the PdSn/C catalysts.

| Potentials<br>(V) | dangling O-H bond |        | trihedrally coordinated<br>water |          | tetrahedrally coordinated water |          |
|-------------------|-------------------|--------|----------------------------------|----------|---------------------------------|----------|
|                   | Area Fit          | Area   | Area Fit                         | Area Fit | Area Fit                        | Area Fit |
|                   | (intensity)       | Fit(%) | (intensity)                      | (%)      | (intensity)                     | (%)      |
| 0.05              | 0.431             | 32.983 | 0.775                            | 59.361   | 0.100                           | 7.655    |
| 0.14              | 0.443             | 32.756 | 0.768                            | 56.778   | 0.142                           | 10.466   |
| 0.22              | 0.452             | 33.505 | 0.790                            | 58.555   | 0.107                           | 7.940    |
| 0.30              | 0.436             | 32.467 | 0.813                            | 60.615   | 0.093                           | 6.918    |
| 0.39              | 0.441             | 33.945 | 0.809                            | 62.319   | 0.048                           | 3.735    |
| 0.47              | 0.476             | 35.461 | 0.785                            | 58.484   | 0.081                           | 6.055    |
| 0.56              | 0.475             | 37.637 | 0.730                            | 57.845   | 0.057                           | 4.518    |
| 0.64              | 0.495             | 41.861 | 0.650                            | 54.989   | 0.037                           | 3.151    |
| 0.73              | 0.472             | 44.838 | 0.561                            | 53.262   | 0.020                           | 1.900    |
| 0.81              | 0.441             | 45.716 | 0.514                            | 53.259   | 0.010                           | 1.024    |
| 0.89              | 0.407             | 49.458 | 0.415                            | 50.356   | 0.002                           | 0.186    |
| 0.98              | 0.396             | 55.248 | 0.301                            | 41.964   | 0.020                           | 2.789    |
| 1.06              | 0.347             | 60.650 | 0.225                            | 39.350   | 0.000                           | 0.000    |
| 1.15              | 0.296             | 73.094 | 0.109                            | 26.906   | 0.000                           | 0.000    |
| 1.23              | 0.213             | 86.262 | 0.034                            | 13.738   | 0.000                           | 0.000    |

**Table S10.** In-situ FTIR fitting analysis of H<sub>2</sub>O in the Pd/C catalysts.

| Potentials<br>(V) | dangling O-H bond |        | trihedrally coordinated<br>water |          | tetrahedrally coordinated water |          |
|-------------------|-------------------|--------|----------------------------------|----------|---------------------------------|----------|
|                   | Area Fit          | Area   | Area Fit                         | Area Fit | Area Fit                        | Area Fit |
|                   | (intensity)       | Fit(%) | (intensity)                      | (%)      | (intensity)                     | (%)      |
| 0.05              | 0.150             | 9.490  | 0.720                            | 45.570   | 0.710                           | 44.940   |
| 0.14              | 0.162             | 10.279 | 0.732                            | 46.363   | 0.685                           | 43.358   |
| 0.22              | 0.190             | 11.656 | 0.770                            | 47.115   | 0.674                           | 41.229   |
| 0.30              | 0.190             | 11.527 | 0.831                            | 50.505   | 0.624                           | 37.969   |
| 0.39              | 0.194             | 11.402 | 0.854                            | 50.163   | 0.655                           | 38.435   |
| 0.47              | 0.223             | 12.666 | 0.876                            | 49.756   | 0.661                           | 37.578   |
| 0.56              | 0.188             | 11.517 | 0.832                            | 51.051   | 0.610                           | 37.432   |
| 0.64              | 0.205             | 13.217 | 0.782                            | 50.282   | 0.567                           | 36.501   |
| 0.73              | 0.193             | 13.084 | 0.756                            | 51.150   | 0.528                           | 35.766   |
| 0.81              | 0.187             | 12.864 | 0.736                            | 50.553   | 0.533                           | 36.583   |
| 0.89              | 0.215             | 13.586 | 0.746                            | 47.158   | 0.621                           | 39.256   |
| 0.98              | 0.138             | 12.881 | 0.539                            | 50.341   | 0.394                           | 36.778   |
| 1.06              | 0.108             | 14.529 | 0.375                            | 50.526   | 0.259                           | 34.945   |
| 1.15              | 0.093             | 16.867 | 0.284                            | 51.771   | 0.172                           | 31.361   |
| 1.23              | 0.064             | 15.913 | 0.205                            | 51.127   | 0.132                           | 32.960   |
| 1.30              | 0.008             | 4.898  | 0.062                            | 37.562   | 0.095                           | 57.540   |

### VIII. Additional information for DFT calculations

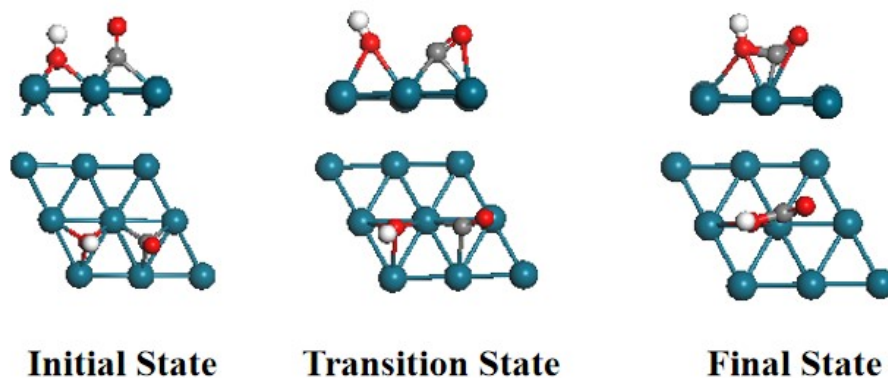

**Figure S9.** The configurations of the initial state, transition state and final state of the reaction  $\text{CO}+\text{OH}\rightarrow\text{COOH}$  on the Pd(111) surface

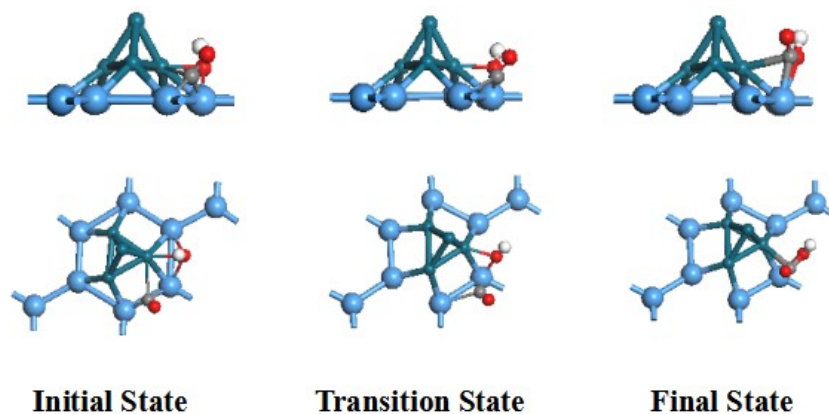

**Figure S10.** The configurations of the initial state, transition state and final state of the reaction  $\text{CO}+\text{OH}\rightarrow\text{COOH}$  on the Pd<sub>4</sub>/TaN(001) surface

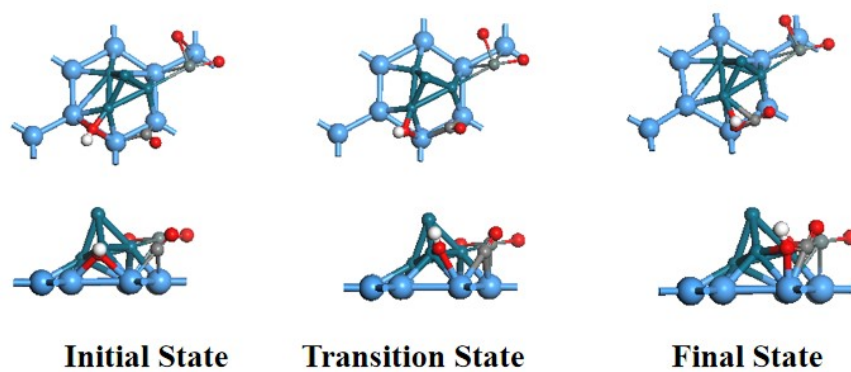

**Figure S11.** The configurations of the initial state, transition state and final state of the reaction  $\text{CO}+\text{OH}\rightarrow\text{COOH}$  on the Pd<sub>4</sub>-SnO<sub>2</sub>/TaN(001) surface

## IX. Additional information for Electrochemical studies towards TaN/C and FAOR

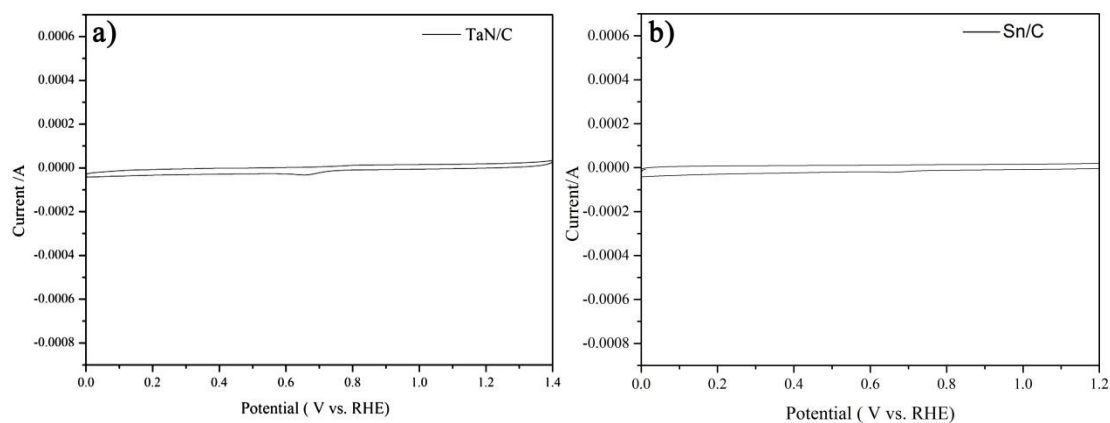

**Figure S12.** CV curves of pure TaN/C (a) and Sn/C (b) catalyst in Ar-saturated 1 M CH<sub>3</sub>OH and 1M KOH with a sweep rate of 50 mv<sup>-1</sup>.

**Table S11.** The catalytic performances of the Pd<sub>x</sub>Sn<sub>y</sub>/TaN-C, Pd<sub>1</sub>Sn<sub>3</sub>/C-m-alkaline and commercial Pd/C for FAOR in acid medium

| Materials                                         | ECSA<br>(m <sup>2</sup> g <sup>-1</sup> ) | FAOR                                                    |                                                          |
|---------------------------------------------------|-------------------------------------------|---------------------------------------------------------|----------------------------------------------------------|
|                                                   |                                           | I <sub>p</sub> (m)/(mA mg <sub>Pd</sub> <sup>-1</sup> ) | I <sub>p</sub> (sa)/(mA cm <sub>Pd</sub> <sup>-2</sup> ) |
| Pd <sub>1</sub> Sn <sub>3</sub> -TaN/C-m-alkaline | 203.99                                    | 2097.29                                                 | 1.03                                                     |
| Pd-TaN/C-m-alkaline                               | 119.45                                    | 1036.68                                                 | 0.86                                                     |
| Pd <sub>1</sub> Sn <sub>3</sub> /C-m-alkaline     | 70.18                                     | 103.67                                                  | 0.15                                                     |
| Commercial Pd/C                                   | 42.23                                     | 215.79                                                  | 0.51                                                     |

**Table S12.** Comparison of PdSn/TaN-C with previous reported Pd-based catalysts towards FAOR in acidic medium.

| <b>Materials</b>                | <b>Electrolyte</b>                                 | <b>Mass activity<br/>(A g<sub>metal</sub><sup>-1</sup>)</b> | <b>CA test<br/>(s)</b> | <b>Residual current<br/>(A g<sub>metal</sub><sup>-1</sup>)</b> | <b>ref</b>       |
|---------------------------------|----------------------------------------------------|-------------------------------------------------------------|------------------------|----------------------------------------------------------------|------------------|
| Pd/NL-GCN                       | 0.5 M NaOH + 1 M CH <sub>3</sub> OH                | 1310.0                                                      | 1000                   | < 50                                                           | [3]              |
| Pd-Mo <sub>2</sub> N/rGO        | 0.5 M H <sub>2</sub> SO <sub>4</sub> + 0.5 M HCOOH | 532.7                                                       | 3600                   | 32.3                                                           | [15]             |
| Pd/rGO                          | 0.5 M H <sub>2</sub> SO <sub>4</sub> + 0.5 M HCOOH | 313.4                                                       | 3600                   | 6.6                                                            | [15]             |
| Pd/VC                           | 0.5 M H <sub>2</sub> SO <sub>4</sub> + 0.5 M HCOOH | 243.4                                                       | 3600                   | 2.7                                                            | [15]             |
| PdNi nanowire/rGO               | 0.5 M H <sub>2</sub> SO <sub>4</sub> + 0.5 M HCOOH | 604.3                                                       | 2000                   | 13                                                             | [16]             |
| PdNiCu/C                        | 0.5 M H <sub>2</sub> SO <sub>4</sub> + 0.5 M HCOOH | 792                                                         | 3600                   | < 10                                                           | [17]             |
| PdNi hollow nanocrystals        | 0.5 M H <sub>2</sub> SO <sub>4</sub> + 0.5 M HCOOH | 768                                                         | 3600                   | 0.2                                                            | [18]             |
| Pd <sub>3</sub> Fe/C            | 0.5 M H <sub>2</sub> SO <sub>4</sub> + 0.5 M HCOOH | 696.4                                                       | 3000                   | < 50                                                           | [19]             |
| PtAgCu@PtCu                     | 0.5 M H <sub>2</sub> SO <sub>4</sub> + 0.5 M HCOOH | 314                                                         | 3000                   | < 40                                                           | [20]             |
| Pd nanosheets                   | 0.5 M H <sub>2</sub> SO <sub>4</sub> + 0.5 M HCOOH | 409.3                                                       | 3000                   | 28.2                                                           | [21]             |
| Pd@Ni-B/C                       | 0.5 M H <sub>2</sub> SO <sub>4</sub> + 0.5 M HCOOH | 400                                                         | 4000                   | < 50                                                           | [22]             |
| Pd <sub>3</sub> Sn <sub>2</sub> | 0.5 M HClO <sub>4</sub> + 0.5 M HCOOH              | 448                                                         | 6000<br>(3600)         | < 5<br>(< 10)                                                  | [23]             |
| Pd                              | 0.5 M HClO <sub>4</sub> + 0.5 M HCOOH              | 630                                                         | 2000                   | < 30                                                           | [24]             |
| PdSn/TaN-C                      | 0.5 M H <sub>2</sub> SO <sub>4</sub> + 0.5 M HCOOH | 2097.29                                                     | 3600                   | 60                                                             | <b>This work</b> |



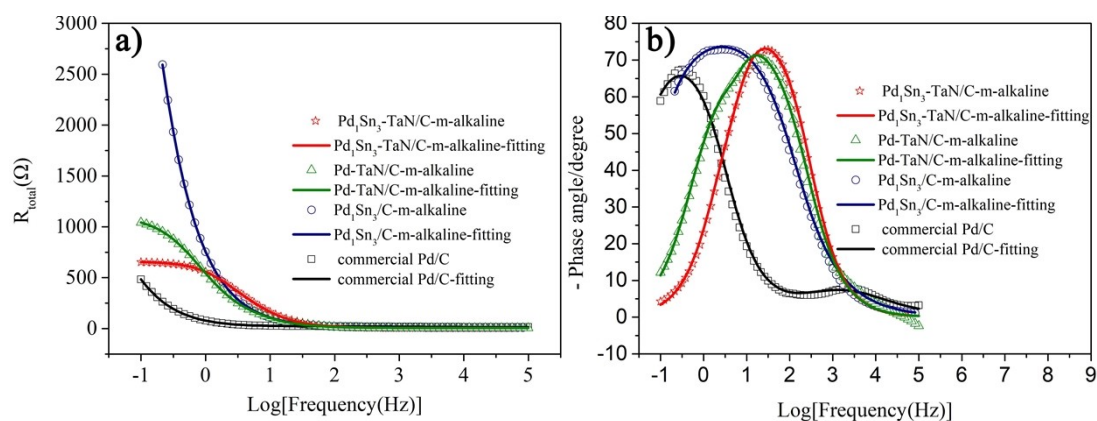

**Figure S13.** The corresponding bode plots for FAOR in acidic medium.

**Table S13.** Kinetic parameters of  $\text{Pd}_x\text{Sn}_y\text{-TaN/C}$ ,  $\text{Pd}_1\text{Sn}_3\text{/C-m-alkaline}$  and commercial Pd/C towards acidic FAOR.

| Materials                                        | $R_s$<br>( $\Omega$ ) | $R_{ct}$<br>( $\Omega$ ) |
|--------------------------------------------------|-----------------------|--------------------------|
| $\text{Pd}_1\text{Sn}_3\text{-TaN/C-m-alkaline}$ | 6.8                   | 597.7                    |
| $\text{Pd-TaN/C-m-alkaline}$                     | 5.8                   | 1089                     |
| $\text{Pd}_1\text{Sn}_3\text{/C-m-alkaline}$     | 8.3                   | 9066                     |
| Commercial Pd/C                                  | 14.11                 | 1751                     |

### References:

- [1] L. Jin, H. Xu, C. Chen, et al, Three-dimensional PdCuM (M = Ru, Rh, Ir) Trimetallic Alloy Nanosheets for Enhancing Methanol Oxidation Electrocatalysis, ACS Appl. Mater. Inter. 11 (2019) 42123-42130.
- [2] T.J. Wang, F.M. Li, H. Huang, et al, Porous Pd-PdO Nanotubes for Methanol Electrooxidation, Adv. Funct. Mater. 30 (2020) 2000534.
- [3] H. Huang, Y. Wei, B. Shen, et al, Synthesis of Multiple-Twinned Pd Nanoparticles Anchored on Graphitic Carbon Nanosheets for Use as Highly-Active Multifunctional Electrocatalyst in Formic Acid and Methanol Oxidation Reactions, Advanced Materials Interfaces. 7 (2020) 2000142.
- [4] A. Serov, T. Asset, M. Padilla, et al, Highly-active Pd-Cu electrocatalysts for oxidation of ubiquitous oxygenated fuels, Applied Catalysis B: Environmental. 191 (2016) 76-85.
- [5] V. Nguyen, Q.C. Tran, N.D. Quang, et al, N-doped Cd/PtPd nanonetwork hybrid materials as highly efficient electrocatalysts for methanol oxidation and formic acid oxidation reactions, J. Alloy. Compd. 766 (2018) 979-986.
- [6] C. Wang, L. Zheng, R. Chang, et al, Palladium-Cobalt Nanowires Decorated with Jagged Appearance for Efficient Methanol Electro-oxidation, ACS Appl. Mater. Inter. 10 (2018) 29965-

- 29971.
- [7] M. Satyanarayana, G. Rajeshkhanna, M.K. Sahoo, et al, Electrocatalytic Activity of Pd<sub>20-x</sub>Ag<sub>x</sub> Nanoparticles Embedded in Carbon Nanotubes for Methanol Oxidation in Alkaline Media, *ACS Applied Energy Materials*. 1 ( 2018) 3763-3770.
- [8] Z. Chen, Y. He, J. Chen, et al, PdCu Alloy Flower-like Nanocages with High Electrocatalytic Performance for Methanol Oxidation, *The Journal of Physical Chemistry C*. 122 ( 2018) 8976-8983.
- [9] H. Shang, H. Xu, C. Wang, et al, General synthesis of Pd-pm (pm = Ga, In, Sn, Pb, Bi) alloy nanosheet assemblies for advanced electrocatalysis, *Nanoscale*. 12 ( 2020) 3411-3417.
- [10] T. Guo, H. Xiang, W. Li, et al, Synthesis of Ultrathin and Composition-Tunable PdPt Porous Nanowires with Enhanced Electrocatalytic Performance, *ACS Sustain. Chem. Eng.* 8 ( 2020) 2901-2909.
- [11] L. Huang, X. Zhang, Q. Wang, et al, Shape-Control of Pt-Ru Nanocrystals: Tuning Surface Structure for Enhanced Electrocatalytic Methanol Oxidation, *J. Am. Chem. Soc.* 140 ( 2018) 1142-1147.
- [12] F. Yang, B. Zhang, S. Dong, et al, Silica nanosphere supported palladium nanoparticles encapsulated with graphene: High-performance electrocatalysts for methanol oxidation reaction, *Appl. Surf. Sci.* 452 ( 2018) 11-18.
- [13] F. Saleem, Z. Zhang, X. Cui, et al, Elemental Segregation in Multimetallic Core-Shell Nanoplates, *J. Am. Chem. Soc.* 141 ( 2019) 14496-14500.
- [14] Q. Tan, C. Shu, J. Abbott, et al, Highly Dispersed Pd-CeO<sub>2</sub> Nanoparticles Supported on N-Doped Core-Shell Structured Mesoporous Carbon for Methanol Oxidation in Alkaline Media, *ACS Catal.* 9 ( 2019) 6362-6371.
- [15] H. Yan, Y. Jiao, A. Wu, et al, Synergism of molybdenum nitride and palladium for high-efficiency formic acid electrooxidation, *J. Mater. Chem. A*. 6 ( 2018) 7623-7630.
- [16] D. Bin, B. Yang, F. Ren, et al, Facile synthesis of PdNi nanowire networks supported on reduced graphene oxide with enhanced catalytic performance for formic acid oxidation, *J. Mater. Chem. A*. 3 ( 2015) 14001-14006.
- [17] S. Hu, F. Munoz, J. Noborikawa, et al, Carbon supported Pd-based bimetallic and trimetallic catalyst for formic acid electrochemical oxidation, *Applied Catalysis B: Environmental*. 180 ( 2016) 758-765.
- [18] Z. Chen, J. Zhang, Y. Zhang, et al, NiO-induced synthesis of PdNi bimetallic hollow nanocrystals with enhanced electrocatalytic activities toward ethanol and formic acid oxidation, *Nano Energy*. 42 ( 2017) 353-362.
- [19] Z. Liu, G. Fu, J. Li, et al, Facile synthesis based on novel carbon-supported cyanogel of structurally ordered Pd<sub>3</sub>Fe/C as electrocatalyst for formic acid oxidation, *Nano Res.* 11 ( 2018) 4686-4696.
- [20] G. Fu, B. Xia, R. Ma, et al, Trimetallic PtAgCu@PtCu core@shell concave nanooctahedrons with enhanced activity for formic acid oxidation reaction, *Nano Energy*. 12 ( 2015) 824-832.
- [21] X. Qiu, H. Zhang, P. Wu, et al, One-Pot Synthesis of Freestanding Porous Palladium Nanosheets as Highly Efficient Electrocatalysts for Formic Acid Oxidation, *Adv. Funct. Mater.* 27 ( 2017) 1603852.
- [22] N. He, Y. Gong, Y. Yang, et al, An effective Pd@Ni-B/C anode catalyst for electro-oxidation of formic acid, *Int. J. Hydrogen Energ.* 43 ( 2018) 3216-3222.

- [23] F. Li, Q. Xue, G. Ma, et al, Formic acid decomposition-inhibited intermetallic Pd<sub>3</sub>Sn<sub>2</sub> nanonetworks for efficient formic acid electrooxidation, *J. Power Sources*. 450 ( 2020) 227615.
- [24] J. Ren, J. Zhang, C. Yang, et al, Pd nanocrystals anchored on 3D hybrid architectures constructed from nitrogen-doped graphene and low-defect carbon nanotube as high-performance multifunctional electrocatalysts for formic acid and methanol oxidation, *Materials Today Energy*. 16 ( 2020) 100409.
